## *Colletotrichum* core effector

# The Conserved *Colletotrichum* spp. Effector CEC3 Induces Nuclear Expansion and Cell Death in Plants

1 Ayako Tsushima<sup>1,2†</sup>, Mari Narusaka<sup>3</sup>, Pamela Gan<sup>2</sup>, Naoyoshi Kumakura<sup>2</sup>, Ryoko Hiroyama<sup>2</sup>,  
2 Naoki Kato<sup>4</sup>, Shunji Takahashi<sup>4</sup>, Yoshitaka Takano<sup>5</sup>, Yoshihiro Narusaka<sup>3</sup>, Ken Shirasu<sup>1,2\*</sup>

3 <sup>1</sup>Graduate School of Science, The University of Tokyo, Bunkyo, Japan

4 <sup>2</sup>Center for Sustainable Resource Science, RIKEN, Yokohama, Japan

5 <sup>3</sup>Research Institute for Biological Sciences Okayama, Kaga-gun, Japan

6 <sup>4</sup>Center for Sustainable Resource Science, RIKEN, Wako, Japan

7 <sup>5</sup>Graduate School of Agriculture, Kyoto University, Kyoto, Japan

8 † Present address:

9 Crop Genetics, John Innes Centre, Norwich Research Park, Norwich, UK

10 \* Correspondence:

11 Ken Shirasu

12 ken.shirasu@riken.jp

13 **Keywords:** core effector, comparative genomics, nuclear expansion, cell death, *Colletotrichum*,  
14 fungal plant pathogen

15

## 16 Abstract

17 Plant pathogens secrete small proteins, known as effectors, that promote infection by manipulating host  
18 cells. Members of the phytopathogenic fungal genus *Colletotrichum* collectively have a broad host  
19 range and generally adopt a hemibiotrophic lifestyle that includes an initial biotrophic phase and a later  
20 necrotrophic phase. We hypothesized that *Colletotrichum* fungi use a set of conserved effectors during  
21 infection to support the two phases of their hemibiotrophic lifestyle. This study aimed to examine this  
22 hypothesis by identifying and characterizing conserved effectors among *Colletotrichum* fungi.  
23 Comparative genomic analyses using genomes of ascomycete fungi with different lifestyles identified  
24 seven effector candidates that are conserved across the genus *Colletotrichum*. Transient expression  
25 assays showed that one of these conserved effectors, CEC3, induces nuclear expansion and cell death  
26 in *Nicotiana benthamiana*, suggesting that CEC3 is involved in promoting host cell death during  
27 infection. Nuclear expansion and cell death induction were commonly observed in CEC3 homologs  
28 from four different *Colletotrichum* species that vary in host specificity. Thus, CEC3 proteins could  
29 represent a novel class of core effectors with functional conservation in the genus *Colletotrichum*.

## 30 Introduction

## ***Colletotrichum* core effector**

31 Plant pathogens have adopted different strategies to extract nutrients from their individual hosts:  
32 evading or disabling the host immune system to establish a parasitic relationship with living cells  
33 (biotrophy), induction of a lethal response (necrotrophy), or by using a combination of these strategies  
34 (hemibiotrophy). These pathogens have evolved an array of secreted proteins that manipulate host cell  
35 responses, collectively referred to as effectors, that allow them to establish a defined relationship with  
36 their hosts. Although effectors play pivotal roles in establishing parasitic interactions, some effectors  
37 are also detected by plants via immune receptors encoded by resistance (R) genes, thereby triggering  
38 strong host immune responses (Dodds and Rathjen, 2010). The genes that encode effectors are called  
39 ‘avirulence genes’ because the plant response triggered by recognition of effectors by cognate immune  
40 receptors results in the loss of virulence. Thus, effectors both positively and negatively impact the  
41 ability of a pathogen to establish a disease state, depending on the host genotype. The importance of  
42 host and pathogen genotypes in the outcome of infection is illustrated by the zig-zag model wherein  
43 pathogens continuously evolve new effectors to overcome plant defense responses and hosts evolve  
44 receptors that recognize the newly evolved effectors, resulting in disease resistance (Jones and Dangl,  
45 2006). As a corollary to this model, the ability to infect a host that can perceive a particular effector  
46 requires that the pathogen lose or alter the effector to escape recognition. Consistent with this model,  
47 previous studies have shown that known avirulence effectors often lack homologs in closely-related  
48 lineages as a result of high selection pressure in the arms race between host and pathogen (Sánchez-  
49 Vallet et al., 2018). In extreme cases, avirulence effector genes such as *Avr4E* and *AvrStb6*, which were  
50 isolated from fungal plant pathogens *Cladosporium fulvum* and *Zymoseptoria tritici*, respectively, have  
51 only been found in specific strains within a single species (Westerink et al., 2004; Zhong et al., 2017).  
52 In contrast, some effectors are widely conserved among different taxa and are required for full  
53 virulence on a range of different hosts. For example, many fungal plant pathogens express LysM  
54 effectors, which protect fungal cells from plant chitinases and dampen host immune responses  
55 (Akcapinar et al., 2015). NIS1 and its homologs are also common among the Ascomycota and  
56 Basidiomycota. NIS1 suppresses the kinase activities of BAK1 and BIK1, which are critical for  
57 transmitting host immune signaling (Irieda et al., 2019). As another example, Pep1 and its homologs,  
58 which inhibit plant peroxidases required for accumulation of reactive oxygen species, are conserved  
59 within the fungal order Ustilaginales (Hemetsberger et al., 2012, 2015). Importantly, these conserved  
60 effectors contribute to pathogenicity by targeting host proteins that are conserved in a wide range of  
61 plant taxa.

62 *Colletotrichum* is one of the most economically important genera among plant pathogenic fungi  
63 because of its ubiquity and ability to cause serious crop losses (Dean et al., 2012). *Colletotrichum* spp.  
64 can be grouped into several major monophyletic clades that are termed species complexes (Cannon et  
65 al., 2012). Among the species complexes, members of the *Colletotrichum gloeosporioides* species  
66 complex tend to have a wide host range as post-harvest pathogens. For example, *Colletotrichum*  
67 *fructicola* infects a wide range of fruits, including strawberry (*Fragaria × ananassa*), apple (*Malus*  
68 *domestica*), and avocado (*Persea americana*) (Weir et al., 2012). In contrast, members of other species  
69 complexes tend to have more limited host ranges. The *Colletotrichum graminicola* species complex  
70 has members that are restricted to infecting gramineous plants, such as *C. graminicola*, which is  
71 associated with maize (Crouch and Beirn, 2009). *Colletotrichum higginsianum*, a member of the  
72 *Colletotrichum destructivum* species complex, infects Brassicaceae plants, including *Arabidopsis*  
73 *thaliana* (O’Connell et al., 2004). Similarly, *Colletotrichum orbiculare* from the *C. orbiculare* species  
74 complex infects Cucurbitaceae plants as well as *Nicotiana benthamiana* (Shen et al., 2001). Therefore,  
75 while members of this genus have a collective wide host range, individual *Colletotrichum* spp. host  
76 ranges are often much more limited. Despite the host range of each *Colletotrichum* sp., the majority  
77 have adapted a hemibiotrophic lifestyle. They develop bulbous primary hyphae within living host cells

## ***Colletotrichum* core effector**

78 during the initial biotrophic phase, then induce host death in the subsequent necrotrophic phase, which  
79 is characterized by the production of filamentous secondary hyphae (Perfect et al., 1999).

80 Based on what is known about the genus *Colletotrichum*, we hypothesize that effectors in  
81 *Colletotrichum* spp. fall into two classes based on their conservation patterns: 1) specialized effectors,  
82 which have recently evolved for adaptation to specific host niches, and 2) conserved effectors, which  
83 are generally required for infection of a wide range of plants. To date, more than 100 genomes of  
84 *Colletotrichum* spp. have been sequenced due to their agricultural importance and scientific interest  
85 (O’Connell et al., 2012; Baroncelli et al., 2014, 2016a; Gan et al., 2016, 2019, 2020; Hacquard et al.,  
86 2016). Using these abundant genome resources, it is now feasible to conduct comparative genomic  
87 analysis and reverse genetics of *Colletotrichum* spp. Since *Colletotrichum* spp. have a collective broad  
88 host range, their effectors conserved within the genus should have important roles during infection  
89 across a wide range of host plants. Here, we identified effector candidates and their conservation  
90 patterns across ascomycetes with different lifestyles. Among them, the effector candidate ChCEC3  
91 (core effector of *Colletotrichum* fungi 3 from *C. higginsianum*), can induce nuclear expansion and cell  
92 death when expressed in *N. benthamiana*. CEC3 homologs from four different *Colletotrichum* species  
93 that have different host specificities also induce nuclear expansion and cell death, indicating that their  
94 functional role is conserved in the genus *Colletotrichum*.

## 95 **Materials and Methods**

### 96 **Prediction of Effector Candidates**

97 In this study, effector candidates were defined as predicted secreted proteins (*i.e.*, those with a signal  
98 peptide sequence but no transmembrane domain) less than 300 amino acids long. SignalP 4.1 (Petersen  
99 et al., 2011) and TMHMM 2.0 (Krogh et al., 2001) were used with default settings to predict signal  
100 peptides and transmembrane domains, respectively.

### 101 **Conservation Patterns of Effector Candidates**

102 Twenty-four ascomycetes that are associated with saprophyte, plant pathogen, or insect pathogen  
103 lifestyles, were selected to assess the conservation patterns of the protein sequences (Supplementary  
104 Table 1). To identify orthogroups, OrthoFinder v2.2.7 (Emms and Kelly, 2015) was used with default  
105 settings. Analyses of all proteins and effector candidates were independently performed. The  
106 conservation patterns of CEC proteins were further investigated by performing BLASTP against the  
107 NCBI non-redundant protein database (last accessed on 29 June 2020) using ChCECs as the query  
108 amino acid sequences with a cutoff  $E$ -value =  $10^{-30}$ . Based on this result, we selected 70 proteomes,  
109 including all of the publicly available proteomes of 35 *Colletotrichum* strains and 35 fungal proteomes  
110 representing different branches of the Ascomycota (Supplementary Table 2). Then, the amino acid  
111 sequences of ChCECs were used as queries for BLASTP against the database generated using the 70  
112 proteomes (cutoff  $E$ -value =  $10^{-30}$ ). To identify functional protein domains of CEC3 proteins,  
113 InterProScan 5.39-77.0 (Mitchell et al., 2019) was used with default settings. Amino acid sequence  
114 alignments and a phylogenetic tree of CEC3 homologs were generated using CLC Genomics  
115 Workbench8 (QIAGEN bioinformatics).

### 116 **Phylogenetic Analyses**

## **Colletotrichum core effector**

117 A phylogenetic tree of 24 ascomycetes was generated from the combined alignments of single-copy  
118 orthologs conserved in all 24 ascomycetes identified using OrthoFinder v2.2.7 with default settings.  
119 Protein sequences were aligned using MAFFT version 7.215 (Katoh et al., 2002) with the --auto  
120 settings and trimmed using trimAL v1.2 (Capella-Gutiérrez et al., 2009) with the automated1 settings.  
121 The concatenated and trimmed alignments were then used to estimate a maximum-likelihood species  
122 phylogeny with RAxML version 8.2.11 (Stamatakis, 2014) with 1,000 bootstrap replicates. To generate  
123 the maximum-likelihood tree, the PROTGAMMAAUTO setting was used to find the best protein  
124 substitution model and the autoMRE setting was used to determine the appropriate number of bootstrap  
125 samples. The tree was visualized using iTOL version 4.1 (Letunic and Bork, 2016). A phylogenetic  
126 tree of 70 ascomycetes was generated in the same way using the combined alignments of single-copy  
127 orthologs conserved across all proteomes (Supplementary Table 2). *Saccharomyces cerevisiae*  
128 sequences were used as the outgroup in both trees.

## 129 **Cloning**

130 Total RNA was extracted from *C. higginsianum* MAFF 305635, *C. orbiculare* MAFF 240422, and *C.*  
131 *graminicola* MAFF 244463 cultured in potato dextrose (PD) broth (BD Biosciences) at 24°C in the  
132 dark for two days. Total RNA was extracted from strawberry (Sachinoka) leaves three days after  
133 inoculation with *C. fructicola* Nara gc5 (JCM 39093) as previously described (Gan et al., 2020). RNA  
134 was extracted using RNeasy Plant Mini Kit (Qiagen) with DNase I treatment according to the  
135 manufacturer's introductions, and reverse transcribed using ReverTraAce qPCR RT Kit (Toyobo, Co.,  
136 Ltd.) or SuperScript III Reverse Transcriptase (Thermo Fisher Scientific). cDNAs of *ChCEC2-1*,  
137 *ChCEC2-2*, and *ChCEC6* were amplified using primers listed in Supplementary Table 3 and Phusion®  
138 High-Fidelity DNA Polymerase (New England Biolabs), then cloned into pCR8/GW/TOPO (Thermo  
139 Fisher Scientific). The CDS of *ChCEC3* was synthesized in pDONR/Zeo (Thermo Fisher Scientific)  
140 by Invitrogen. The *ChCEC* sequences were transferred into Gateway-compatible pSfInx (pSfInx-GW)  
141 (Narusaka et al., 2013) using Gateway LR Clonase Enzyme mix (Thermo Fisher Scientific). cDNAs  
142 of *CEC3* without stop codons and the regions encoding predicted signal peptides and stop codons were  
143 also amplified and cloned into pCR8/GW/TOPO. Each *CEC3* derivative was transferred into pGWB5  
144 (Nakagawa et al., 2007) with Gateway LR Clonase Enzyme mix. *ChCEC3ASP* and *YFP* cloned from  
145 pGWB41 (Nakagawa et al., 2007) in pCR8/GW/TOPO were also transferred into pEDV6 (Fabro et al.,  
146 2011) using Gateway LR Clonase Enzyme mix. We deposited the cDNA sequences of *CoCEC3-2.2*  
147 from *C. orbiculare* MAFF 240422 and *CgCEC3* from *C. graminicola* MAFF 244463 in NCBI  
148 GenBank under the accession numbers MW528236 and MW528237, respectively.

149 To create transformation vectors for overexpression or knock-out mutations, we first generated  
150 pAGM4723\_TEF\_GFP\_scd1\_HygR using Golden Gate cloning (Engler et al., 2014) (Supplementary  
151 Figure 1). To generate pAGM4723\_TEF\_ChCEC3g\_scd1\_HygR, genomic DNA encoding *ChCEC3*  
152 and the linearized pAGM4723\_TEF\_GFP\_scd1\_HygR lacking the GFP sequence were amplified  
153 using KOD -Plus- Neo (Toyobo, Co., Ltd.), then the fragments were circularized using In-Fusion HD  
154 (Takara Bio Inc.). To generate pAGM4723-ChCEC3KO, 5' and 3' 2 kb genomic fragments of  
155 *ChCEC3*, the hygromycin resistance cassette, and linearized pAGM4723 were amplified using KOD -  
156 Plus- Neo. These fragments were circularized using In-Fusion HD. Genomic DNA of *C. higginsianum*  
157 MAFF 305635 was extracted using DNeasy Plant Mini Kit (Qiagen).

## 158 **Cell Death-Inducing Effector Candidate Screening**

## 160 *Colletotrichum* core effector

159 *Agrobacterium tumefaciens* strain GV3101 was used to screen for cell death-inducing effector  
160 candidates. Binary vectors were transformed into *A. tumefaciens* with the freeze-thaw method or by  
161 electroporation. After transformation, *A. tumefaciens* was cultured on Luria-Bertani (LB) agar (Merck  
162 KGaA) containing 100 µg/ml rifampicin and 50 µg/ml kanamycin at 28°C for two days. *A. tumefaciens*  
163 transformant colonies were purified and cultured in LB broth supplemented with 100 µg/ml rifampicin  
164 and 50 µg/ml kanamycin at 28°C for two days with shaking at 120 rpm for agroinfiltration. Bacterial  
165 cells were collected by centrifugation and resuspended in 10 mM MgCl<sub>2</sub>, 10 mM MES (pH 5.6), and  
166 150 µM acetosyringone. Each bacterial suspension was adjusted to OD<sub>600</sub> = 0.3. Suspensions were  
167 infiltrated into 4-week-old *N. benthamiana* leaves grown at 25°C under long-day conditions (16 h  
168 light/8 h dark) using 1 ml needleless syringes. Plant cell death was visualized six days after infiltration  
169 under UV illumination.

## 170 Cell Death Assays

171 Binary vectors were transformed into *A. tumefaciens* strain AGL1 with the freeze-thaw method or by  
172 electroporation. We used *A. tumefaciens* strain C58C1 pCH32 harboring pBCKH 35S promoter::GFP  
173 as a negative control to express 35S-driven GFP (Mitsuda et al., 2006). *A. tumefaciens* cultures were  
174 prepared as described above. For cell death assays, bacterial suspensions were adjusted to OD<sub>600</sub> = 0.5.  
175 Suspensions were infiltrated into 4-week-old *N. benthamiana* leaves using 1 ml needleless syringes.  
176 Plant cell death was visualized by trypan blue staining five days after infiltration: each *N. benthamiana*  
177 leaf was boiled in 20 ml of alcoholic lactophenol (ethanol: phenol: glycerol: lactic acid: water (4: 1: 1 :  
178 1: 1, v/v/v/v/v)) containing 0.1 µg/ml trypan blue for 15 minutes and left overnight at room temperature.  
179 Boiled leaves were destained with 40% chloral hydrate solution for three to five days before being  
180 photographed. Eight different infiltrated leaves were observed for each construct.

## 181 Confocal Microscopy

182 *A. tumefaciens* strain AGL1 prepared as above (OD<sub>600</sub> = 0.3) and carrying binary vectors was infiltrated  
183 into 4-week-old *N. benthamiana* leaves. Protein localization was assessed 24 or 36 hours after  
184 infiltration in epidermal cells of *N. benthamiana* using Leica SP8 (Leica Microsystems) or Zeiss LSM  
185 700 (Carl Zeiss AG) microscopes. For DAPI (4',6-diamidino-2-phenylindole) staining, the Staining  
186 Buffer in CyStain UV precise P (Sysmex America, Inc.) was infiltrated into *N. benthamiana* leaves  
187 using 1 ml needleless syringes one hour before observation. To image GFP fluorescence, excitation  
188 was at 488 nm and emission was collected between 495 and 550 nm. For mCherry fluorescence,  
189 excitation was at 555 nm and emission was between 505 and 600 nm. DAPI fluorescence was excited  
190 at 405 nm and observed between 410 and 480 nm. Chlorophyll autofluorescence was excited at 633  
191 nm and observed between 638 and 700 nm. Nuclear diameters were measured at their narrowest points  
192 (minor axes) using ImageJ 1.51k (Schneider et al., 2012).

## 193 Transformation and Infection of *C. higginsianum*

194 *C. higginsianum* transformants were obtained using *A. tumefaciens* as described in Supplementary  
195 Material 1. Transformants were genotyped by PCR using primers listed in Supplementary Table 3. We  
196 confirmed constitutive expression by semi-quantitative PCR in fungal hyphae cultured in PD broth for  
197 two days at 24°C in the dark for *ChCEC3* over-expressing lines. For lesion area measurement assays,  
198 *Arabidopsis thaliana* Col-0 plants were grown at 22°C with a 10-h photoperiod for four weeks. *C.*  
199 *higginsianum* MAFF 305635 and the transformants were cultured on PDA at 24°C under 12-h black-  
200 light blue fluorescent bulb/12-h dark conditions for one week. Lesion area measurement assays

## Colletotrichum core effector

201 were performed as described (Tsushima et al. 2019a). Three leaves per plant were inoculated with 5-  
202  $\mu$ l droplets of conidial suspensions at  $5 \times 10^5$  conidia/ml. Symptoms were observed six days after  
203 inoculation, and lesion areas were measured using the color threshold function of ImageJ 1.51k  
204 (Schneider et al., 2012) using the following settings: hue, 0–255; saturation, 110–140; and brightness,  
205 0–255 with a square region of interest. For RT-qPCR analysis, we used fungal hyphae cultured in PD  
206 broth for two days at 24°C in the dark as *in vitro* samples and epidermal tissues from infected leaves  
207 as *in planta* samples. Epidermal tissues were sampled following the methods described by Takahara et  
208 al., 2009 and Kleemann et al., 2012. Approximately 100 detached four-week-old *A. thaliana* leaves per  
209 sample were placed on a piece of wet paper towel in a plastic dish. The abaxial leaf surface was  
210 inoculated with approximately 50  $\mu$ l of conidial suspension at  $5 \times 10^6$  conidia/ml using a micropipette.  
211 After inoculation, the lid of the plastic dish was secured using Parafilm to maintain 100% humidity  
212 during infection. Inoculated leaves were incubated at 22°C in the dark until sample collection. The  
213 epidermis was peeled from the infected abaxial leaf surface using tweezers and double-sided tape, then  
214 immediately flash frozen in liquid nitrogen and stored at -80°C until RNA extraction.

## 215 RT-qPCR Analysis

216 Total RNA was extracted using RNeasy Plant Mini Kit with DNase I treatment according to the  
217 manufacturer's introductions. RT-qPCR was performed using ReverTra Ace (Toyobo, Co., Ltd.) and  
218 THUNDERBIRD SYBR qPCR Mix (Toyobo, Co., Ltd.). Reactions were run on an Mx3000P QPCR  
219 system and analyzed with MxPro QPCR software (Stratagene California) using primers listed in  
220 Supplementary Table 3. To confirm progression of infection at each time point, a few inoculated leaves  
221 were stained with 1 ml/leaf alcoholic lactophenol containing 0.1  $\mu$ g/ml trypan blue for five minutes at  
222 95°C and left overnight at room temperature. Boiled leaves were destained with 40% chloral hydrate  
223 solution for three to five days before being observing fungal structures using an Olympus BX51  
224 microscope (Olympus Corporation).

## 225 *Pseudomonas syringae* pv. *tomato* DC3000 Transformation and Infection

226 Plasmid constructs pEDV6:ChCEC3 $\Delta$ SP and pEDV6:YFP were mobilized from *Escherichia coli*  
227 DH5 $\alpha$  into *Pseudomonas syringae* pv. *tomato* (*Pto*) DC3000 by triparental mating using *E. coli* HB101  
228 (pRK2013) as the helper strain. *Pto* DC3000 carrying pEDV6:ChCEC3 $\Delta$ SP or pEDV6:YFP was  
229 cultured on LB agar containing 100  $\mu$ g/ml rifampicin and 20  $\mu$ g/ml gentamicin at 28°C in the dark for  
230 two days. Bacterial cells collected from LB agar were suspended in 10 mM MgCl<sub>2</sub>, adjusted to OD<sub>600</sub>  
231 = 0.0002, and infiltrated into three leaves per plant using 1 ml needleless syringes. Leaf tissue was  
232 collected using an 8 mm diameter biopsy punch four days after inoculation, and homogenized in 1 ml  
233 distilled water. Homogenized tissue was diluted in a tenfold dilution series from  $5 \times 10^{-3}$  to  $5 \times 10^{-6}$   
234 and spotted onto LB agar containing 100  $\mu$ g/ml rifampicin. After overnight incubation at 24°C, colony  
235 forming units per unit area (cfu)/cm<sup>2</sup> were determined.

## 236 Immunoblotting

237 To examine protein expression of CEC3 homologs expressed by agroinfiltration, protein samples were  
238 extracted using GTEN-buffer (10% (v/v) Glycerol, 25 mM Tris-HCl (pH 7.5), 1 mM EDTA, 150 mM  
239 NaCl, 10 mM DTT, 1 $\times$ Plant protease inhibitor cocktail (Sigma)). Proteins were separated on Criterion  
240 TGX Precast Gels (4-15%) (Bio-Rad Laboratories, Inc.) and electroblotted onto PVDF membranes  
241 using a Trans-Blot Turbo Transfer System (Bio-Rad Laboratories, Inc.). Membranes were blocked in  
242 TBS-T with 5% skim milk powder at 4°C overnight and incubated in 1:8000 diluted anti-GFP antibody

## ***Colletotrichum* core effector**

243 (Ab290; Abcam) in TBS-T with 5% skim milk powder for one hour at room temperature. After  
244 washing with TBS-T, membranes were incubated in 1:10000 diluted anti-rabbit IgG (NA934-1ML;  
245 GE Healthcare) in TBS-T for one hour at room temperature. Following a final wash with TBS-T,  
246 signals were detected using SuperSignal West Femto Maximum Sensitivity Substrate (Thermo Fisher  
247 Scientific) and ImageQuant LAS 4010 (GE Healthcare). Proteins on the membrane were visualized by  
248 Coomassie Brilliant Blue (CBB) staining. *A. thaliana* leaves infiltrated with 10 mM MgCl<sub>2</sub> or *Pto*  
249 DC3000 carrying pEDV6:ChCEC3ΔSP or pEDV6:YFP (OD<sub>600</sub> = 2.0) were sampled 24 hours after  
250 inoculation to assess expression of ChCEC3ΔSP and YFP proteins in *Pto* DC3000, followed by  
251 immunoblotting as described above. Protein concentrations for each sample were measured using  
252 Pierce BCA Protein Assay Kit (Thermo Fisher Scientific) and Infinite F200 PRO (Tecan Group Ltd.),  
253 and a total of 100 μg of protein was loaded for each sample onto SDS-PAGE gels. Proteins were  
254 detected using 1:5000 diluted anti-HA antibody (Anti-HA-Peroxidase, High Affinity (3F10); Roche)  
255 in TBS-T.

## 256 **Results**

### 257 **Identification of Effector Candidates Conserved in *Colletotrichum* spp.**

258 To identify *Colletotrichum* conserved candidate effectors, we analyzed the proteomes of 24  
259 ascomycetes, including seven *Colletotrichum* species representing the six species complexes and one  
260 minor clade. Putative secreted proteins were classified as effector candidates if their lengths were less  
261 than 300 amino acids. To investigate the conservation patterns of all proteins and effector candidates  
262 from the 24 ascomycetes, orthogroups of these two datasets were independently determined using  
263 OrthoFinder (Emms and Kelly, 2015). This analysis identified 15,521 all protein (AP) orthogroups and  
264 990 effector candidate (EC) orthogroups. The proportion of genes belonging to AP orthogroups ranges  
265 from 67.4% in *Botrytis cinerea* to 99.2% in *Colletotrichum chlorophyti*, while the proportion of genes  
266 belonging to EC orthogroups ranges from 28.4% in *S. cerevisiae* to 98.9% in *C. chlorophyti* (Figure  
267 1A). The percentage of shared orthogroups between each species indicates that effector candidates are  
268 less conserved than all proteins (Figure 1B). Among AP orthogroups, 2,424 (15.61%) were found in  
269 all ascomycetes tested. In contrast, there were no EC orthogroups that were conserved across all of the  
270 ascomycetes tested. This analysis identified seven EC orthogroups (0.71%) that are conserved in all  
271 *Colletotrichum* species, but not the other ascomycetes tested (Figure 1C, Supplementary Table 4). We  
272 have designated these effector candidates CEC1 (core effector of *Colletotrichum*) to CEC7. Among  
273 the eight predicted CEC proteins from *C. higginsianum* (ChCECs), ChCEC2 has two homologs  
274 (ChCEC2-1 and ChCEC2-2) and the others have one homolog. ChCEC2-2 and ChCEC4 were  
275 previously identified as ChEC65 and ChEC98, respectively (Kleemann et al., 2012; Robin et al., 2018)  
276 (Supplementary Table 5).

### 277 **CEC3 is Conserved among *Colletotrichum* spp. and the Expression of *ChCEC3* Induces Cell** 278 **Death in *N. benthamiana***

279 To assess the conservation of *CEC* genes in greater detail, the amino acid sequences of ChCECs were  
280 queried against the NCBI non-redundant protein database (BLASTP, cutoff *E*-value = 10<sup>-30</sup>)  
281 (Supplementary Material 2). Based on this result, we selected 70 proteomes, including all publicly  
282 available proteomes of 35 *Colletotrichum* strains and 35 fungal proteomes representing different  
283 branches of the Ascomycota. The conservation patterns of *CEC* genes were further investigated against  
284 the database generated using the 70 proteomes (BLASTP, cutoff *E*-value = 10<sup>-30</sup>) (Figure 2A). This

## ***Colletotrichum* core effector**

285 analysis revealed that CEC1, CEC4, and CEC7 are specifically found in *Colletotrichum* spp., but they  
286 are not conserved across the genus. In contrast, highly similar homologs of CEC2, CEC3, and CEC6  
287 are conserved across the *Colletotrichum* genus as well as some other ascomycetes. A supplementary  
288 analysis to determine if ChCECs have known functional domains (InterProScan 5.39-77.0; Mitchell et  
289 al., 2019) indicated that, except for signal peptides, they have no known functional domains (Figure  
290 2B).

291 Since *Colletotrichum* spp. are hemibiotrophic plant pathogens that employ a necrotrophic phase during  
292 which host cells are killed, we hypothesized that some CECs may induce plant cell death. Based on  
293 this hypothesis, we examined the cell death-inducing activities of expressed CECs. A previous *C.*  
294 *higginsianum* transcriptome study reported that *ChCEC2-1*, *ChCEC2-2*, *ChCEC3*, and *ChCEC6* were  
295 up-regulated during infection (O'Connell et al., 2012) (Supplementary Figure 2). We amplified cDNAs  
296 of *ChCEC2-1*, *ChCEC2-2*, and *ChCEC6* and synthesized the predicted *ChCEC3* CDS, then cloned  
297 these sequences into pSfinx-GW to further examine their roles in inducing cell death. Having verified  
298 that the cloned sequences were identical to the predicted CDSs reported in Tsushima et al., 2019b, they  
299 were transiently expressed in *N. benthamiana* leaves using *A. tumefaciens*-mediated transient  
300 transformation (agroinfiltration). This experiment showed that expression of *ChCEC3*, but not  
301 *ChCEC2-1*, *ChCEC2-2*, or *ChCEC6*, induced cell death in *N. benthamiana* leaves (Figure 2C).

## **302 The Cell Death-Inducing Ability of CEC3 is Conserved among Four *Colletotrichum* Species**

303 To investigate whether the function of *CEC3* genes is conserved across *Colletotrichum* species  
304 pathogenic on different host plants, we cloned the cDNAs of *CEC3* homologs from *C. higginsianum*  
305 (*ChCEC3*), *C. orbiculare* (*CoCEC3-1* and *CoCEC3-2*), *C. fructicola* (*CfCEC3-1* and *CfCEC3-2*), and  
306 *C. graminicola* (*CgCEC3*) into pGWB5 for expression under the control of the 35S CaMV promoter  
307 with a C-terminal GFP-tag (Supplementary Figure 3). *ChCEC3*, *CoCEC3-1*, *CoCEC3-2*, *CfCEC3-1*,  
308 and *CfCEC3-2* were identical to the previously predicted CDSs (Tsushima et al., 2019b; Gan et al.,  
309 2019 and 2020). However, *CgCEC3* from *C. graminicola* MAFF 244463 had a 30 bp insertion  
310 encoding 10 extra amino acid sequences, and a missense mutation (Supplementary Figure 4) compared  
311 to the predicted CDS of *C. graminicola* M1.001 (XM\_008096207.1) (O'Connell et al. 2012)  
312 (Supplementary Figure 4A). The sequence of *CoCEC3-2* is identical to the predicted CDS encoding a  
313 206-aa peptide, but we also cloned a shorter splice variant that encodes a 65-aa peptide due to an  
314 internal stop codon in the second exon (Supplementary Figure 5A). To distinguish the two variants  
315 transcribed from the *CoCEC3-2* gene, we refer to the longer variant having the predicted CDS as  
316 *CoCEC3-2.1* and the shorter variant as *CoCEC3-2.2*. The amino acid sequences of the cloned CEC3  
317 homologs were predicted to have no similarity to known functional domains using InterProScan 5.39-  
318 77.0 database except for signal peptides and transmembrane helices (Mitchell et al., 2019)  
319 (Supplementary Figure 5B). The amino acid sequences of *CoCEC3-2.1* and *CoCEC3-2.2* were  
320 excluded due to their transmembrane helices. Alignment of amino acid sequences of the cloned  
321 homologs with *CoCEC3-2.2* indicated that they are generally well-conserved except at the C-termini  
322 (Supplementary Figure 5C).

323 To assess if other CEC3 homologs also induce cell death, we performed an agroinfiltration assay.  
324 *ChCEC3-GFP*, *CoCEC3-1-GFP*, *CoCEC3-2.1-GFP*, *CfCEC3-1-GFP*, *CfCEC3-2-GFP*, but not  
325 *CoCEC3-2.2-GFP* and *CgCEC3-GFP*, induced cell death in *N. benthamiana* leaves by five days after  
326 infiltration (Figure 3). To investigate whether CEC3 proteins act in the extracellular or intracellular  
327 compartments, we also tested *CEC3-GFP* lacking the regions encoding predicted signal peptides ( $\Delta$ SP).  
328 This experiment showed that cell death induced by transient expression of the truncated constructs



## ***Colletotrichum* core effector**

329 tended to be stronger than full-length sequences (Figure 3). For example, although *CgCEC3-GFP* did  
330 not induce cell death, *CgCEC3 $\Delta$ SP-GFP* induced weak cell death in *N. benthamiana* leaves. However,  
331 some GFP-tagged CEC3 proteins including *CgCEC3-GFP* and *CgCEC3 $\Delta$ SP-GFP* did not appear to be  
332 expressed well because they were not detectable by immunoblotting (Supplementary Figure 6).

## **CEC3 Induces Plant Nuclear Expansion**

334 To investigate CEC3 protein function in the plant cell, we observed the subcellular localization of  
335 transiently expressed ChCEC3-GFP in *N. benthamiana* leaf epidermal cells. ChCEC3-GFP was  
336 localized to mobile punctate structures, as well as the surface of spherical structures located in the  
337 center of cells expressing the protein (Supplementary Figure 7). As each ChCEC3-GFP-expressing cell  
338 always contained only one spherical structure with GFP signals at its periphery, we hypothesized that  
339 the spherical structure may be an expanded nucleus. To test this hypothesis, we transiently co-  
340 expressed ChCEC3-GFP and the endoplasmic reticulum (ER) marker HDML-mCherry (Nelson et al.,  
341 2007), which is continuous with the nuclear envelope. This experiment revealed that ChCEC3-GFP  
342 and HDML-mCherry were colocalized, indicating that ChCEC3-GFP localizes to the ER  
343 (Supplementary Figure 7). We also stained ChCEC3-GFP-expressing cells with DAPI, which showed  
344 that the spherical structures in cells expressing ChCEC3-GFP were expanded nuclei (Figure 4A).  
345 Median nuclear diameters were greater in ChCEC3-GFP-expressing cells than in GFP-expressing cells  
346 as controls (Figure 4B). The expanded nucleus phenotype was also observed in cells expressing other  
347 GFP-fused CEC3 homologs, suggesting that the function of CEC3 is conserved among homologs  
348 (Supplementary Figure 8). The detection of GFP signals on the surface of nuclei was signal peptide-  
349 dependent, as deletion of signal peptides resulted in nucleocytoplasmic localization (Figure 4A and  
350 Supplementary Figure 8). However, nuclei were still enlarged, suggesting that the signal peptide-  
351 deleted versions of CEC3 homologs also induce structural changes in the nuclei (Figure 4A, B and  
352 Supplementary Figure 8). We did not detect the nuclear expansion phenotype in CoCEC3-2.2-GFP,  
353 CoCEC3-2.2 $\Delta$ SP-GFP, or *CgCEC3-GFP*-expressing cells. This is likely due to the low expression or  
354 instability of the fusion protein as shown in the immunoblotting (Supplementary Figure 6).

## **ChCEC3 Does Not Significantly Affect *C. higginsianum* or *Pto* DC3000 Virulence on *A. thaliana***

356 To investigate the contribution of *ChCEC3* to fungal virulence, we quantified its transcript levels  
357 during infection using RT-qPCR. In *A. thaliana* ecotype Col-0 leaves, the expression of *ChCEC3* was  
358 induced *in planta*, especially at 22 and 40 hours after inoculation, which correspond to the penetration  
359 and biotrophic stages, respectively (Figure 5A and Supplementary Figure 9). Next, we generated  
360 overexpression lines (Supplementary Figure 10) and knockouts in *C. higginsianum*, and inoculated *A.*  
361 *thaliana* ecotype Col-0 with these transformants. The lesion sizes of *ChCEC3* overexpression and  
362 knockout transformants did not differ significantly from those of the wild type *C. higginsianum* six  
363 days after inoculation (Figure 5B, C).

364 We also evaluated the virulence effect of CEC3 on infection by the model bacterial pathogen, *Pto*  
365 DC3000 that was modified to deliver ChCEC3 $\Delta$ SP, or YFP control, into plant cells using a bacterial  
366 type III secretion system-based effector delivery system with the AvrRPS4 N-terminal domain (Sohn  
367 et al., 2007). This experiment was done to test if ChCEC3 targets a general component(s) of host  
368 immunity. Expression of AvrRPS4N-HA-YFP and AvrRPS4N-HA-ChCEC3 $\Delta$ SP by *Pto* DC3000 was  
369 confirmed by immunoblotting (Supplementary Figure 11A). However, the colonization of *Pto*  
370 DC3000-expressing AvrRPS4N-HA-ChCEC3 $\Delta$ SP was not significantly different than *Pto* DC3000  
371 expressing the control, AvrRPS4N-HA-YFP, at four days after infiltration (Supplementary Figure 11B).

## *Colletotrichum* core effector

### 372 Discussion

373 Effectors play critical roles during infection by acting at the interface between microbes and host plants.  
374 Identification of conserved effectors among *Colletotrichum* fungi is thus expected to provide new  
375 insights into common infection strategies employed by members of this genus. Here, we identified  
376 effector candidates that are conserved across the *Colletotrichum* genus by performing comparative  
377 genomic analyses and showed that one of the candidates, CEC3, induces nuclear expansion and cell  
378 death in the plant.

379 In this study, we employed the clustering-based orthogroup inference method to identify the  
380 conservation patterns of proteins while considering evolutionary distances of 24 ascomycete fungi.  
381 Using this method, we identified seven CEC proteins that are specifically conserved in seven  
382 *Colletotrichum* species. BLASTP analysis of a wider range of organisms revealed that CEC2, CEC3,  
383 and CEC6 homologs are conserved in the genus *Colletotrichum* as well as in other closely-related  
384 fungal genera including *Pseudocercospora*, *Venturia*, *Bipolaris*, *Alternaria*, *Diaporthe*, and  
385 *Neonectria*, all of which are plant pathogens (Condon et al., 2013; Gómez-Cortecero et al., 2015;  
386 Baroncelli et al., 2016b; Chang et al., 2016; Passey et al., 2018; Armitage et al., 2020), suggesting that  
387 these CEC proteins may function as effectors in other plant-fungal pathogen interactions. BLASTP  
388 analyses showed that CEC1, CEC4, and CEC7 had limited amino acid sequence similarity despite  
389 being classified into separate orthogroups. These orthogroups may therefore have evolved different  
390 functions since their divergence, and may be worth further scrutiny. As the quantity and quality of  
391 genomic information are crucial for identifying specific/conserved genes using bioinformatic  
392 approaches, it would be of considerable interest to reanalyze the conservation patterns of effector  
393 candidates when a greater number of contiguous genome assemblies become available.

394 Agroinfiltration assays showed that the cell death-inducing ability of CEC3 proteins is conserved  
395 across four *Colletotrichum* species with different host specificities. Many *Colletotrichum* species,  
396 including *C. higginsianum*, establish hemibiotrophic infections, comprising an initial biotrophic phase  
397 during which they maintain host cell viability, and a later necrotrophic phase in which they elicit host  
398 cell death. The RT-qPCR experiment showed that *ChCEC3* is highly expressed in the biotrophic phase,  
399 thus CEC3 proteins may contribute to the shift in infection phases and promote colonization by  
400 initiating cell death. Alternatively, CEC3 may be recognized by a nucleotide-binding domain and  
401 leucine-rich repeat (NLR) receptor, thus leading to hypersensitive response (HR) cell death, which  
402 often limits pathogen growth (Jones et al., 2016). However, *C. orbiculare*, which expresses *CoCEC3-*  
403 *1* and *CoCEC3-2.1* is fully virulent on *N. benthamiana* (Shen et al., 2001), suggesting that CEC3-  
404 induced cell death is not linked to host resistance *per se*. One possible explanation, in this case, is that  
405 CEC3-induced cell death might be inhibited by other effectors such as ChEC3, ChEC3a, ChEC5,  
406 ChEC6, and ChEC34 from *C. higginsianum* and CoDN3 from *C. orbiculare* with the result that cell  
407 death is suppressed or delayed in *N. benthamiana* leaves (Kleemann et al., 2012; Yoshino et al., 2012).

408 Our experiments show that CEC3 proteins are likely cytoplasmic effectors because the nucleus-  
409 expanding and cell death-inducing abilities of the homologs are not eliminated by deleting the signal  
410 peptide region. In contrast, previously characterized *Colletotrichum* effectors, CtNudix from *C.*  
411 *truncatum* and ChELP1 and ChELP2 from *C. higginsianum* are considered to be apoplastic effectors  
412 because transient expression of the full-length constructs of CtNudix induces cell death, but not the  
413 construct lacking the signal peptide and ChELP1 and ChELP2 are confirmed to target plant  
414 extracellular components (Bhadauria et al., 2013; Takahara et al., 2016). These findings suggest that  
415 *Colletotrichum* spp. utilize both cytoplasmic and apoplastic effectors as shown in other filamentous  
416 plant pathogens (Giraldo and Valent, 2013).

## ***Colletotrichum* core effector**

417 One remarkable finding from this study was that the transient expression of CEC3 proteins induces  
418 nuclear expansion in *N. benthamiana* epidermal cells. Although enlarged nuclei have been observed in  
419 *Medicago truncatula* and *Daucus carota* cells infected by the arbuscular mycorrhizal fungus  
420 *Gigaspora gigantea* (Genre et al., 2008) as well as in *A. thaliana* cells infected by the powdery mildew  
421 fungus *Golovinomyces orontii* (Chandran et al., 2010), similar phenomena have not been reported in  
422 *Colletotrichum*-infected plant cells. It is possible, given that agroinfiltration provides strong transient  
423 expression in plant cells, CEC3 proteins may function without inducing nuclear expansion at  
424 endogenous expression levels during infection. Interestingly, Robin et al. reported that transient  
425 expression of the effector candidate ChEC106 from *C. higginsianum* increases nuclear areas in *N.*  
426 *benthamiana* epidermal cells nearly three-fold (Robin et al. 2018). While both CEC3 and ChEC106  
427 enlarge nuclei, there are differences in their phenotypes; (i) the GFP-tagged CEC3 $\Delta$ SP series are  
428 localized in the nucleocytoplasm, but GFP-tagged ChEC106 lacking the signal peptide is localized  
429 inside nuclei. (ii) The nuclei in CEC3-expressing cells are weakly stained by DAPI, but nuclei in  
430 ChEC106-expressing cells are strongly stained. (iii) CEC3-induced nuclear expansion always  
431 correlates with the cell death induction phenotype, whereas ChEC106 does not induce cell death. Thus,  
432 it is tempting to speculate that *Colletotrichum* fungi manipulate host nuclei using multiple effectors  
433 with different mechanisms of action. To our knowledge, CEC3 is the first effector candidate that  
434 induces both nuclear expansion and cell death in plants in transient expression assays. Some previous  
435 studies reported analogous enlarged nuclei during cell death in *A. thaliana* cells immediately after  
436 wounding (Cutler and Somerville, 2005) and in *Lolium temulentum* and *Sorghum bicolor* young silica  
437 cells, which deposit solid silica followed by cell death (Lawton, 1980; Kumar and Elbaum, 2018).  
438 However, the molecular mechanisms underlying these phenomena remain elusive. To dissect the  
439 nuclear expansion mechanisms and their link with cell death induction, the host target of CEC3, as  
440 well as factors involving nuclear structural changes during cell death in general, should be a focus of  
441 future studies.

442 The evolutionary as well as functional conservation of CEC3 proteins suggests that *Colletotrichum* spp.  
443 may target a conserved host element that is essential for plant immunity. We showed that CgCEC3  
444 induced neither cell death nor nuclear expansion and that CgCEC3 $\Delta$ SP induced weaker cell death, but  
445 did cause nuclear expansion at a similar level as other homologs. Given that CgCEC3 was cloned from  
446 *C. graminicola*, the only monocot-infecting pathogen included in this study, CgCEC3 might be  
447 unstable, incorrectly folded, or otherwise not fully functional in *N. benthamiana*, which is highly  
448 diverged from maize, the host plant of *C. graminicola*. CEC3 proteins may have been adapted to target  
449 protein homologs in different host plants as shown in EPIC1 and PmEPIC1 from *Phytophthora*  
450 *infestans* and *P. mirabilis* that specialized to inhibit homologous proteases from their respective  
451 *Solanum* and *Mirabilis* hosts (Dong et al., 2014).

452 No virulence function for ChCEC3 was detected using fungal and bacterial systems under the  
453 conditions of this study, suggesting that ChCEC3 may be functionally redundant to other effectors in  
454 terms of its contribution to virulence, or that its contribution is minor. Plant-pathogen interactions exert  
455 strong directional selection pressure on both host and parasite, especially on genes encoding immune  
456 receptors and effectors (Plissonneau et al., 2017). Conversely, effectors that contribute little to  
457 virulence would not be subject to positive selection, and could thus remain relatively unchanged over  
458 evolutionary time. Therefore, *Colletotrichum* fungi may deploy a layer of effectors with restricted  
459 virulence effects and with functional redundancy that would result in weaker selection pressure. For a  
460 better understanding of the collective virulence effect of core effectors, further work is required, for  
461 example by using multiple knock-out mutants with a selection marker recycling system (Kumakura et  
462 al., 2019).

## ***Colletotrichum* core effector**

463 In this work we identified CEC3 as a highly conserved effector candidate among several other  
464 candidates in the phytopathogenic genus *Colletotrichum*. A series of analyses suggest that CEC3  
465 proteins may have a role in manipulating host nuclei and promoting host cell death during infection.  
466 CEC3 proteins therefore could represent a novel class of core effectors that shows functional  
467 conservation in the *Colletotrichum* genus.

### **468 Conflict of Interest**

469 The authors declare that the research was conducted in the absence of any commercial or financial  
470 relationships that could be construed as a potential conflict of interest.

### **471 Author Contribution**

472 YT, YN, and KS: conceived the study. AT and PG: performed computational analyses and interpreted  
473 the data. AT, MN, PG, NKumakura, RH, NKato, and ST: performed the molecular biological  
474 experiments and interpreted the data. AT and PG: performed imaging analyses and interpreted the data.  
475 AT and NKumakura: prepared the figures and tables. AT, PG, NKumakura, and KS: wrote and revised  
476 the manuscript. All authors helped to edit the manuscript and approved the final version.

### **477 Funding**

478 This work was supported in part by KAKENHI (JP19K05961 to MN, JP19K15846 to PG, JP18K14440  
479 and JP20K15500 to NKumakura, JP20K05967 to YN, and JP17H06172 to KS), the Science and  
480 Technology Research Promotion Program for Agriculture, Forestry, Fisheries and Food industry to YN  
481 and YT, and JSPS Grant-in-Aid for JSPS Research Fellow to AT (17J02983).

### **482 Acknowledgments**

483 We thank Ms. Akiko Ueno for technical support. We also thank Dr. Hidenori Matsui and Dr. Akira  
484 Iwase for kindly providing *A. tumefaciens* strain C58C1 pCH32 harboring pBCKH 35S promoter::GFP.

### **485 References**

- 486 Akcapinar, G. B., Kappel, L., Sezerman, O. U., and Seidl-Seiboth, V. (2015). Molecular diversity of  
487 LysM carbohydrate-binding motifs in fungi. *Curr. Genet.* 61, 103–113. doi:10.1007/s00294-014-  
488 0471-9.
- 489 Armitage, A. D., Cockerton, H. M., Sreenivasaprasad, S., Woodhall, J., Lane, C. R., Harrison, R. J., et  
490 al. (2020). Genomics Evolutionary History and Diagnostics of the *Alternaria alternata* Species  
491 Group Including Apple and Asian Pear Pathotypes. *Front. Microbiol.* 10, 3124.  
492 doi:10.3389/fmicb.2019.03124.
- 493 Baroncelli, R., Amby, D. B., Zapparata, A., Sarrocco, S., Vannacci, G., Le Floch, G., et al. (2016a).  
494 Gene family expansions and contractions are associated with host range in plant pathogens of the  
495 genus *Colletotrichum*. *BMC Genomics* 17, 555. doi:10.1186/s12864-016-2917-6.
- 496 Baroncelli, R., Scala, F., Vergara, M., Thon, M. R., and Ruocco, M. (2016b). Draft whole-genome  
497 sequence of the *Diaporthe helianthi* 7/96 strain, causal agent of sunflower stem canker. *Genomics*  
498 *Data* 10, 151–152. doi:10.1016/j.gdata.2016.11.005.

## ***Colletotrichum* core effector**

- 499 Baroncelli, R., Sreenivasaprasad, S., Sukno, S. a, Thon, M. R., and Holub, E. (2014). Draft Genome  
500 Sequence of *Colletotrichum acutatum Sensu Lato* (*Colletotrichum fioriniae*). *Genome Announc.*  
501 2, e00112–14. doi:10.1128/genomeA.00112-14.
- 502 Bhadauria, V., Banniza, S., Vandenberg, A., Selvaraj, G., and Wei, Y. (2013). Overexpression of a  
503 novel biotrophy-specific *Colletotrichum truncatum* effector, CtNUDIX, in hemibiotrophic fungal  
504 phytopathogens causes incompatibility with their host plants. *Eukaryot. Cell* 12, 2–11.  
505 doi:10.1128/EC.00192-12.
- 506 Cannon, P. F., Damm, U., Johnston, P. R., and Weir, B. S. (2012). *Colletotrichum* - current status and  
507 future directions. *Stud. Mycol.* 73, 181–213. doi:10.3114/sim0014.
- 508 Capella-Gutiérrez, S., Silla-Martínez, J. M., and Gabaldón, T. (2009). trimAl: A tool for automated  
509 alignment trimming in large-scale phylogenetic analyses. *Bioinformatics* 25, 1972–1973.  
510 doi:10.1093/bioinformatics/btp348.
- 511 Chandran, D., Inada, N., Hather, G., Kleindt, C. K., and Wildermuth, M. C. (2010). Laser  
512 microdissection of *Arabidopsis* cells at the powdery mildew infection site reveals site-specific  
513 processes and regulators. *Proc. Natl. Acad. Sci. U. S. A.* 107, 460–465.  
514 doi:10.1073/pnas.0912492107.
- 515 Chang, T.-C., Salvucci, A., Crous, P. W., and Stergiopoulos, I. (2016). Comparative Genomics of the  
516 Sigatoka Disease Complex on Banana Suggests a Link between Parallel Evolutionary Changes in  
517 *Pseudocercospora fijiensis* and *Pseudocercospora eumusae* and Increased Virulence on the  
518 Banana Host. *PLOS Genet.* 12, e1005904. doi:10.1371/journal.pgen.1005904.
- 519 Condon, B. J., Leng, Y., Wu, D., Bushley, K. E., Ohm, R. A., Otilar, R., et al. (2013). Comparative  
520 Genome Structure, Secondary Metabolite, and Effector Coding Capacity across *Cochliobolus*  
521 Pathogens. *PLoS Genet.* 9, e1003233. doi:10.1371/journal.pgen.1003233.
- 522 Crouch, J. A., and Beirn, L. A. (2009). Anthracnose of cereals and grasses. *Fungal Divers.* 39, 19–44.
- 523 Cutler, S. R., and Somerville, C. R. (2005). Imaging plant cell death: GFP-Nit1 aggregation marks an  
524 early step of wound and herbicide induced cell death. *BMC Plant Biol.* 5, 4. doi:10.1186/1471-  
525 2229-5-4.
- 526 Dean, R., Van Kan, J. A. L., Pretorius, Z. A., Hammond-Kosack, K. E., Di Pietro, A., Spanu, P. D., et  
527 al. (2012). The Top 10 fungal pathogens in molecular plant pathology. *Mol. Plant Pathol.* 13,  
528 414–430. doi:10.1111/j.1364-3703.2011.00783.x.
- 529 Dodds, P. N., and Rathjen, J. P. (2010). Plant immunity: towards an integrated view of plant-pathogen  
530 interactions. *Nat. Rev. Genet.* 11, 539–548. doi:10.1038/nrg2812.
- 531 Dong, S., Stam, R., Cano, L. M., Song, J., Sklenar, J., Yoshida, K., et al. (2014). Effector specialization  
532 in a lineage of the Irish potato famine pathogen. *Science* 343, 552–5.  
533 doi:10.1126/science.1246300.
- 534 Emms, D. M., and Kelly, S. (2015). OrthoFinder: solving fundamental biases in whole genome  
535 comparisons dramatically improves orthogroup inference accuracy. *Genome Biol.* 16, 157.  
536 doi:10.1186/s13059-015-0721-2.

## ***Colletotrichum* core effector**

- 537 Engler, C., Youles, M., Gruetzner, R., Ehnert, T. M., Werner, S., Jones, J. D. G., et al. (2014). A Golden  
538 Gate modular cloning toolbox for plants. *ACS Synth. Biol.* 3, 839–843. doi:10.1021/sb4001504.
- 539 Fabro, G., Steinbrenner, J., Coates, M., Ishaque, N., Baxter, L., Studholme, D. J., et al. (2011). Multiple  
540 Candidate Effectors from the Oomycete Pathogen *Hyaloperonospora arabidopsidis* Suppress  
541 Host Plant Immunity. *PLoS Pathog.* 7, e1002348. doi:10.1371/journal.ppat.1002348.
- 542 Gan, P., Hiroyama, R., Tsushima, A., Masuda, S., Shibata, A., Ueno, A., et al. (2020). Subtelomeric  
543 regions and a repeat-rich chromosome harbor multicopy effector gene clusters with variable  
544 conservation in multiple plant pathogenic *Colletotrichum* species. *bioRxiv*, 2020.04.28.061093.  
545 doi:10.1101/2020.04.28.061093.
- 546 Gan, P., Narusaka, M., Kumakura, N., Tsushima, A., Takano, Y., Narusaka, Y., et al. (2016). Genus-  
547 Wide Comparative Genome Analyses of *Colletotrichum* Species Reveal Specific Gene Family  
548 Losses and Gains during Adaptation to Specific Infection Lifestyles. *Genome Biol. Evol.* 8, 1467–  
549 1481. doi:10.1093/gbe/evw089.
- 550 Gan, P., Tsushima, A., Narusaka, M., Narusaka, Y., Takano, Y., Kubo, Y., et al. (2019). Genome  
551 sequence resources for four phytopathogenic fungi from the *Colletotrichum orbiculare* species  
552 complex. *Mol. Plant-Microbe Interact.* 32, 1088–1090. doi:10.1094/MPMI-12-18-0352-A.
- 553 Genre, A., Chabaud, M., Faccio, A., Barker, D. G., and Bonfante, P. (2008). Prepenetration Apparatus  
554 Assembly Precedes and Predicts the Colonization Patterns of Arbuscular Mycorrhizal Fungi  
555 within the Root Cortex of Both *Medicago truncatula* and *Daucus carota*. *Plant Cell* 20, 1407–  
556 1420. doi:10.1105/tpc.108.059014.
- 557 Giraldo, M. C., and Valent, B. (2013). Filamentous plant pathogen effectors in action. *Nat. Rev.*  
558 *Microbiol.* 11, 800–814. doi:10.1038/nrmicro3119.
- 559 Gómez-Cortecero, A., Harrison, R. J., and Armitage, A. D. (2015). Draft genome sequence of a  
560 European isolate of the apple canker pathogen *Neonectria ditissima*. *Genome Announc.* 3,  
561 e01243–15. doi: 10.1128/genomeA.01243-15.
- 562 Hacquard, S., Kracher, B., Hiruma, K., Münch, P. C., Garrido-Oter, R., Thon, M. R., et al. (2016).  
563 Survival trade-offs in plant roots during colonization by closely related beneficial and pathogenic  
564 fungi. *Nat. Commun.* 7, 11362. doi:10.1038/ncomms11362.
- 565 Hemetsberger, C., Herrberger, C., Zechmann, B., Hillmer, M., and Doehlemann, G. (2012). The  
566 *Ustilago maydis* Effector Pep1 Suppresses Plant Immunity by Inhibition of Host Peroxidase  
567 Activity. *PLoS Pathog.* 8, e1002684. doi:10.1371/journal.ppat.1002684.
- 568 Hemetsberger, C., Mueller, A. N., Matei, A., Herrberger, C., Hensel, G., Kumlehn, J., et al. (2015).  
569 The fungal core effector Pep1 is conserved across smuts of dicots and monocots. *New Phytol.* 206,  
570 1116–1126. doi:10.1111/nph.13304.
- 571 Irieda, H., Inoue, Y., Mori, M., Yamada, K., Oshikawa, Y., Saitoh, H., et al. (2019). Conserved fungal  
572 effector suppresses PAMP-triggered immunity by targeting plant immune kinases. *Proc. Natl.*  
573 *Acad. Sci. U. S. A.* 116, 496–505. doi:10.1073/pnas.1807297116.

### ***Colletotrichum* core effector**

- 574 Jones, J. D. G., and Dangl, J. L. (2006). The plant immune system. *Nature* 444, 323–329.  
575 doi:10.1038/nature05286.
- 576 Jones, J. D. G., Vance, R. E., and Dangl, J. L. (2016). Intracellular innate immune surveillance devices  
577 in plants and animals. *Science* 354, aaf6395. doi:10.1126/science.aaf6395.
- 578 Katoh, K., Misawa, K., Kuma, K., and Miyata, T. (2002). MAFFT: a novel method for rapid multiple  
579 sequence alignment based on fast Fourier transform. *Nucleic Acids Res.* 30, 3059–3066.  
580 doi:10.1093/nar/gkf436.
- 581 Kleemann, J., Rincon-Rivera, L. J., Takahara, H., Neumann, U., van Themaat, E. V. L., van der Does,  
582 H. C., et al. (2012). Sequential Delivery of Host-Induced Virulence Effectors by Appressoria and  
583 Intracellular Hyphae of the Phytopathogen *Colletotrichum higginsianum*. *PLoS Pathog.* 8,  
584 e1002643. doi:10.1371/journal.ppat.1002643.
- 585 Krogh, A., Larsson, B., von Heijne, G., and Sonnhammer, E. L. L. (2001). Predicting transmembrane  
586 protein topology with a hidden markov model: application to complete genomes. *J. Mol. Biol.*  
587 305, 567–580. doi:10.1006/jmbi.2000.4315.
- 588 Kumakura, N., Ueno, A., and Shirasu, K. (2019). Establishment of a selection marker recycling system  
589 for sequential transformation of the plant-pathogenic fungus *Colletotrichum orbiculare*. *Mol.*  
590 *Plant Pathol.* 20, 447–459. doi:10.1111/mpp.12766.
- 591 Kumar, S., and Elbaum, R. (2018). Interplay between silica deposition and viability during the life span  
592 of sorghum silica cells. *New Phytol.* 217, 1137–1145. doi:10.1111/nph.14867.
- 593 Lawton, J. R. (1980). Observations on the structure of epidermal cells, particularly the cork and silica  
594 cells, from the flowering stem internode of *Lolium temulentum* L. (Gramineae). *Bot. J. Linn. Soc.*  
595 80, 161–177. doi:10.1111/j.1095-8339.1980.tb01663.x.
- 596 Letunic, I., and Bork, P. (2016). Interactive tree of life (iTOL) v3: an online tool for the display and  
597 annotation of phylogenetic and other trees. *Nucleic Acids Res.* 44, W242–W245.  
598 doi:10.1093/nar/gkw290.
- 599 Mitchell, A. L., Attwood, T. K., Babbitt, P. C., Blum, M., Bork, P., Bridge, A., et al. (2019). InterPro  
600 in 2019: Improving coverage, classification and access to protein sequence annotations. *Nucleic*  
601 *Acids Res.* 47, D351–D360. doi:10.1093/nar/gky1100.
- 602 Mitsuda, N., Hiratsu, K., Todaka, D., Nakashima, K., Yamaguchi-Shinozaki, K., and Ohme-Takagi,  
603 M. (2006). Efficient production of male and female sterile plants by expression of a chimeric  
604 repressor in *Arabidopsis* and rice. *Plant Biotechnol. J.* 4, 325–332. doi:10.1111/j.1467-  
605 7652.2006.00184.x.
- 606 Nakagawa, T., Kurose, T., Hino, T., Tanaka, K., Kawamukai, M., Niwa, Y., et al. (2007). Development  
607 of series of gateway binary vectors, pGWBs, for realizing efficient construction of fusion genes  
608 for plant transformation. *J. Biosci. Bioeng.* 104, 34–41. doi:10.1263/jbb.104.34.

## *Colletotrichum* core effector

- 609 Narusaka, M., Kubo, Y., Hatakeyama, K., Imamura, J., Ezura, H., Nanasato, Y., et al. (2013).  
610 Interfamily Transfer of Dual NB-LRR Genes Confers Resistance to Multiple Pathogens. *PLoS*  
611 *One* 8, 6–13. doi:10.1371/journal.pone.0055954.
- 612 Nelson, B. K., Cai, X., and Nebenführ, A. (2007). A multicolored set of *in vivo* organelle markers for  
613 co-localization studies in Arabidopsis and other plants. *Plant J.* 51, 1126–1136.  
614 doi:10.1111/j.1365-313X.2007.03212.x.
- 615 O’Connell, R., Herbert, C., Sreenivasaprasad, S., Khatib, M., Esquerré-Tugayé, M.-T., and Dumas, B.  
616 (2004). A novel *Arabidopsis-Colletotrichum* pathosystem for the molecular dissection of plant-  
617 fungal interactions. *Mol. Plant. Microbe. Interact.* 17, 272–282.  
618 doi:10.1094/MPMI.2004.17.3.272.
- 619 O’Connell, R. J., Thon, M. R., Hacquard, S., Amyotte, S. G., Kleemann, J., Torres, M. F., et al. (2012).  
620 Lifestyle transitions in plant pathogenic *Colletotrichum* fungi deciphered by genome and  
621 transcriptome analyses. *Nat. Genet.* 44, 1060–5. doi:10.1038/ng.2372.
- 622 Passey, T. A. J., Armitage, A. D., and Xu, X. (2018). Annotated Draft Genome Sequence of the Apple  
623 Scab Pathogen *Venturia inaequalis*. *Microbiol. Resour. Announc.* 7, e01062–18.  
624 doi:10.1128/mra.01062-18.
- 625 Perfect, S. E., Hughes, H. B., O’Connell, R. J., and Green, J. R. (1999). *Colletotrichum*: A model genus  
626 for studies on pathology and fungal-plant interactions. *Fungal Genet. Biol.* 27, 186–98.  
627 doi:10.1006/fgbi.1999.1143.
- 628 Petersen, T. N., Brunak, S., Von Heijne, G., and Nielsen, H. (2011). SignalP 4.0: Discriminating signal  
629 peptides from transmembrane regions. *Nat. Methods* 8, 785–786. doi:10.1038/nmeth.1701.
- 630 Plissonneau, C., Benevenuto, J., Mohd-Assaad, N., Fouché, S., Hartmann, F. E., and Croll, D. (2017).  
631 Using Population and Comparative Genomics to Understand the Genetic Basis of Effector-Driven  
632 Fungal Pathogen Evolution. *Front. Plant Sci.* 8, 119. doi:10.3389/fpls.2017.00119.
- 633 Robin, G. P., Kleemann, J., Neumann, U., Cabre, L., Dallery, J.-F., Lapalu, N., et al. (2018).  
634 Subcellular Localization Screening of *Colletotrichum higginsianum* Effector Candidates  
635 Identifies Fungal Proteins Targeted to Plant Peroxisomes, Golgi Bodies, and Microtubules. *Front.*  
636 *Plant Sci.* 9, 562. doi:10.3389/fpls.2018.00562.
- 637 Sánchez-Vallet, A., Fouché, S., Fudal, I., Hartmann, F. E., Soyer, J. L., Tellier, A., et al. (2018). The  
638 Genome Biology of Effector Gene Evolution in Filamentous Plant Pathogens. *Annu. Rev.*  
639 *Phytopathol.* 56, 21–40. doi:10.1146/annurev-phyto-080516.
- 640 Schneider, C. A., Rasband, W. S., and Eliceiri, K. W. (2012). NIH Image to ImageJ: 25 years of image  
641 analysis. *Nat. Methods* 9, 671–675. doi:10.1038/nmeth.2089.
- 642 Shen, S., Goodwin, P. H., and Hsiang, T. (2001). Infection of *Nicotiana* species by the anthracnose  
643 fungus, *Colletotrichum orbiculare*. *Eur. J. Plant Pathol.* 107, 767–773.  
644 doi:10.1023/A:1012280102161.



## *Colletotrichum* core effector

- 645 Sohn, K. H., Lei, R., Nemri, A., and Jones, J. D. G. (2007). The downy mildew effector proteins ATR1  
646 and ATR13 promote disease susceptibility in *Arabidopsis thaliana*. *Plant Cell* 19, 4077–4090.  
647 doi:10.1105/tpc.107.054262.
- 648 Stamatakis, A. (2014). RAxML version 8: a tool for phylogenetic analysis and post-analysis of large  
649 phylogenies. *Bioinformatics* 30, 1312–1313. doi:10.1093/bioinformatics/btu033.
- 650 Takahara, H., Dolf, A., Endl, E., and O’Connell, R. (2009). Flow cytometric purification of  
651 *Colletotrichum higginsianum* biotrophic hyphae from *Arabidopsis* leaves for stage-specific  
652 transcriptome analysis. *Plant J.* 59, 672–683. doi:10.1111/j.1365-313X.2009.03896.x.
- 653 Takahara, H., Hacquard, S., Kombrink, A., Hughes, H. B., Halder, V., Robin, G. P., et al. (2016).  
654 *Colletotrichum higginsianum* extracellular LysM proteins play dual roles in appressorial function  
655 and suppression of chitin-triggered plant immunity. *New Phytol.* 211, 1323–1337.  
656 doi:10.1111/nph.13994.
- 657 Tsushima, A., Gan, P., and Shirasu, K. (2019a). Method for Assessing Virulence of *Colletotrichum*  
658 *higginsianum* on *Arabidopsis thaliana* Leaves Using Automated Lesion Area Detection and  
659 Measurement. *BIO-PROTOCOL.* 9, e3434. doi:10.21769/bioprotoc.3434.
- 660 Tsushima, A., Gan, P., Kumakura, N., Narusaka, M., Takano, Y., Narusaka, Y., et al. (2019b).  
661 Genomic Plasticity Mediated by Transposable Elements in the Plant Pathogenic Fungus  
662 *Colletotrichum higginsianum*. *Genome Biol. Evol.* 11, 1487–1500. doi:10.1093/gbe/evz087.
- 663 Weir, B. S., Johnston, P. R., and Damm, U. (2012). The *Colletotrichum gloeosporioides* species  
664 complex. *Stud. Mycol.* 73, 115–180. doi:10.3114/sim0011.
- 665 Westerink, N., Brandwagt, B. F., De Wit, P. J. G. M., and Joosten, M. H. A. J. (2004). *Cladosporium*  
666 *fulvum* circumvents the second functional resistance gene homologue at the *Cf-4* locus (*Hcr9-4E*)  
667 by secretion of a stable avr4E isoform. *Mol. Microbiol.* 54, 533–545. doi:10.1111/j.1365-  
668 2958.2004.04288.x.
- 669 Yoshino, K., Irieda, H., Sugimoto, F., Yoshioka, H., Okuno, T., and Takano, Y. (2012). Cell death of  
670 *Nicotiana benthamiana* is induced by secreted protein NIS1 of *Colletotrichum orbiculare* and is  
671 suppressed by a homologue of CgDN3. *Mol. Plant. Microbe. Interact.* 25, 625–36.  
672 doi:10.1094/MPMI-12-11-0316.
- 673 Zhong, Z., Marcel, T. C., Hartmann, F. E., Ma, X., Plissonneau, C., Zala, M., et al. (2017). A small  
674 secreted protein in *Zymoseptoria tritici* is responsible for avirulence on wheat cultivars carrying  
675 the *Stb6* resistance gene. *New Phytol.* 214, 619–631. doi:10.1111/nph.14434.

676

## 677 Figure captions

678 **FIGURE 1.** | Conservation patterns of proteomes from 24 ascomycete fungi. (A) Number of proteins  
679 assigned to orthogroups. A maximum-likelihood species phylogeny was drawn based on the alignment  
680 of single-copy orthologs obtained using OrthoFinder. Bootstrap values are based on 1,000 replicates.  
681 The yellow box indicates *Colletotrichum* species. SCER: *Saccharomyces cerevisiae*, ANID:  
682 *Aspergillus nidulans*, LEPM: *Leptosphaeria maculans*, BIMA: *Bipolaris maydis*, SCSC: *Sclerotinia*

## **Colletotrichum core effector**

683 *sclerotiorum*, BOTC: *Botrytis cinerea*, EUTL: *Eutypa lata*, MGOR: *Magnaporthe oryzae*, NCRA:  
684 *Neurospora crassa*, PODA: *Podospora anserine*, CHGL: *Chaetomium globosum*, METR:  
685 *Metarhizium robertsii*, TRIV: *Trichoderma virens*, NECH: *Nectria haematococca*, FUGR: *Fusarium*  
686 *graminearum*, FUOX: *Fusarium oxysporum* f. sp. *lycopersici*, VDAH: *Verticillium dahliae*, CFIO: *C.*  
687 *fioriniae*, CGRA: *C. graminicola*, CINC: *C. incanum*, CMAF: *C. higginsianum*, CCHL: *C. chlorophyti*,  
688 CFRU: *C. fructicola*, CORB: *C. orbiculare*. **(B)** Heatmap showing the conservation of orthogroups of  
689 all proteins (upper) and effector candidates (lower) between each species. *Colletotrichum* species are  
690 highlighted with yellow boxes. **(C)** Conservation patterns of effector candidates from *Colletotrichum*  
691 species. The bar chart indicates the number of effector candidates in orthogroups by conservation  
692 pattern.

693 **FIGURE 2.** | **(A)** Conservation patterns of *CEC* genes examined using BLASTP. The maximum-  
694 likelihood species phylogeny was drawn based on the alignment patterns of single-copy orthologs  
695 obtained using OrthoFinder. Bootstrap values are based on 1,000 replicates. Colored boxes represent  
696 species complexes within the *Colletotrichum* genus. **(B)** Predicted functional domains of *CEC* proteins  
697 found in *C. higginsianum* MAFF 305635-RFP. Red letters indicate effector candidates that are up-  
698 regulated during infection as reported previously (O'Connell et al., 2012). **(C)** Representative cell death  
699 assay result using *A. tumefaciens* harboring pSfinx vectors. The image was taken six days after  
700 infiltration under UV illumination. No GFP fluorescence was visible, as it was weaker than  
701 fluorescence from dead leaf tissue.

702 **FIGURE 3.** | Transient expression of *GFP*-tagged *CEC3* gene-induced cell death in *N. benthamiana*.  
703 *N. benthamiana* leaves were detached five days after infiltration with *A. tumefaciens* strains carrying  
704 *GFP*-tagged *CEC3* genes in binary vectors, and stained with trypan blue to visualize cell death. Stacked  
705 bars are color-coded to show the number of each cell death level (+++, ++, +, -). Cell death induction  
706 levels were determined from observation of eight different stained leaves. Representative stained leaf  
707 images are shown on the left of the stacked bars. Bar = 5 mm.

708 **FIGURE 4.** | **(A)** Transient expression of *GFP*-tagged Ch*CEC3* protein-induced nuclear expansion in  
709 *N. benthamiana* leaf cells. In merged images, green represents *GFP* signals, cyan represents DAPI  
710 signals, and magenta represents chlorophyll autofluorescence. Open arrowheads indicate expanded  
711 nuclei. Images were taken 24 hours after infiltration. Bars = 10  $\mu$ m. **(B)** Boxplots of nuclear diameters  
712 resulting from transient expression of *GFP*-tagged *CEC3* proteins. Data represent the medians of  
713 biological replicates. N represents the number of nuclei examined. Co*CEC3*-2.2 $\Delta$ SP-*GFP* is not  
714 included because no *GFP* signal was detected. Analysis of variance with Tukey post-hoc honestly  
715 significant difference test ( $P < 0.05$ ) was performed.

716 **FIGURE 5.** | **(A)** RT-qPCR analysis of *ChCEC3* transcript levels in hyphae *in vitro* versus *in planta*  
717 infection time course. *ChCEC3* transcript levels were normalized against *ChTubulin*. Data represent  
718 the means of biological replicates. Error bars indicate standard error of the mean. N represents the  
719 number of biological replicates. **(B and C)** Boxplots of lesion area assays using *ChCEC3*  
720 overexpressors and knock-out mutants. For lesion area assays, *A. thaliana* ecotype Col-0 was  
721 inoculated with *C. higginsianum* strains. Symptoms were observed six days after inoculation. Data  
722 represent the medians of biological replicates. N represents the number of biological replicates.  
723 Analysis of variance with Tukey post-hoc honestly significant difference test ( $P < 0.05$ ) was performed.  
724 The experiments were repeated three times with similar results.

725 **Supplementary Figure 1.** | Plasmid constructions for infection assays. **(A)** pAGM4723. **(B)**  
726 pAGM4723\_TEF\_GFP\_scd1\_HygR was generated using Golden Gate cloning. **(C)**

## **Colletotrichum core effector**

727 pAGM4723\_TEF\_ChCEC3g\_scd1\_HygR for generating *ChCEC3* overexpressors in *C. higginsianum*.  
728 **(D)** pAGM4723-ChCEC3KO for generating *Chcec3* knock-out mutants in *C. higginsianum*.

729 **Supplementary Figure 2.** | *ChCEC* transcript levels in *C. higginsianum* IMI 349063. The data are  
730 from O'Connell et al. 2012. VA: *in vitro* appressoria (22 hours post-inoculation (hpi)), PA: *in planta*  
731 appressoria (22 hpi), BP: biotrophic phase (40 hpi), NP: necrotrophic phase (60 hpi). Red letters  
732 indicate effector candidates that are up-regulated during infection. *C. higginsianum* IMI 349063  
733 transcriptome data reported in Dallery et al. 2017 was not used because the annotation used in that  
734 study lacked the gene model for *ChCEC2-1* (CH063\_14294).

735 **Supplementary Figure 3.** | Maximum likelihood phylogeny of CEC3 proteins. Values at nodes are  
736 based on 1,000 bootstrap replicates. Red boxes indicate CEC3 homologs cloned into pGWB5.

737 **Supplementary Figure 4.** | Alignments of deposited and cloned *CgCEC3* sequences. **(A)** Nucleotide  
738 sequence alignments of XM\_008096207.1 and the cloned *CgCEC3* cDNA sequence. **(B)** Amino acid  
739 sequence alignments of XP\_008094398.1 and the cloned *CgCEC3* translated sequence. Red boxes  
740 indicate sites with differences.

741 **Supplementary Figure 5.** | Cloned *CEC* homologs. **(A)** mRNA structures of the cloned *CEC3*  
742 homologs. **(B)** Predicted functional domains of the cloned *CEC* homologs. **(C)** Amino acid sequence  
743 alignments of the cloned *CEC3* proteins except CoCEC3-2.2. The sequence highlighted by a red box  
744 indicates the predicted signal peptides.

745 **Supplementary Figure 6.** | Immunoblotting of GFP-tagged *CEC3* proteins transiently expressed in *N.*  
746 *benthamiana*. Samples were collected three days after infiltration. Red letters indicate lanes with bands  
747 at the expected size. Stars represent the expected sizes after signal peptide cleavage. CBB staining  
748 shows Rubisco large subunit protein as a loading control.

749 **Supplementary Figure 7.** | Subcellular localization of ChCEC3-GFP and ChCEC3 $\Delta$ SP-GFP. *N.*  
750 *benthamiana* leaves were co-infiltrated with *A. tumefaciens* carrying ChCEC3-GFP, ChCEC3 $\Delta$ SP-  
751 GFP, or GFP and HDEL-mCherry. Open arrowheads indicate mobile punctate structures. Images were  
752 taken at 36 hours after infiltration. Bars = 10  $\mu$ m.

753 **Supplementary Figure 8.** | Transient expression of GFP-tagged *CEC3* protein-induced nuclear  
754 expansion in *N. benthamiana* leaf cells. In merged images, green represents GFP signals, cyan  
755 represents DAPI signals, and magenta represents chlorophyll autofluorescence. Open arrowheads  
756 indicate expanded nuclei. CoCEC3-2.2 $\Delta$ SP-GFP is not included because no GFP signal was detected.  
757 Images were taken 24 hours after infiltration. Bars = 10  $\mu$ m.

758 **Supplementary Figure 9.** | Infection of *A. thaliana* ecotype Col-0 with *C. higginsianum*. **(A)**  
759 Appressoria formed on the leaf surface at 22 hours after inoculation. **(B)** An appressorium penetrating  
760 an epidermal cell to develop a small primary hypha (black arrowhead). **(C)** An appressorium forming  
761 a primary hypha (black arrowhead) and an appressorium forming an infection vesicle (white  
762 arrowhead). **(D)** Secondary hyphae (black arrowheads) growing in an epidermal cell resulting in cell  
763 death 60 hours after inoculation. Bars = 20  $\mu$ m.

764 **Supplementary Figure 10.** | Semi-quantitative PCR analysis to confirm the constitutive expression of  
765 *ChCEC3* in fungal hyphae cultured in PD broth for two days at 24°C in the dark. *ChTubulin* was used  
766 as a reference for variation in fungal biomass.

### ***Colletotrichum* core effector**

767 **Supplementary Figure 11.** | Bacterial type III secretion system-based effector delivery system. **(A)**  
768 The production of AvrRPS4N-HA-YFP and AvrRPS4N-HA-ChCEC3 $\Delta$ SP by *Pto* DC3000. The  
769 production of ChCEC3 $\Delta$ SP was not detected due to low expression or instability of this protein. CBB  
770 staining shows Rubisco large subunit protein as a loading control. **(B)** Relative growth of *Pto* DC3000  
771 carrying AvrRPS4N-HA-YFP and AvrRPS4N-HA-ChCEC3 $\Delta$ SP in *A. thaliana* ecotype Col-0. Leaves  
772 of 5-week-old plants were hand-inoculated with OD<sub>600</sub> = 0.0002 suspensions of *Pto* DC3000 strains.  
773 Samples were taken four days after inoculation to determine the extent of bacterial colonization. Error  
774 bars represent the standard deviations from the mean of eight samples for each strain. The experiments  
775 were repeated three times with similar results.

A

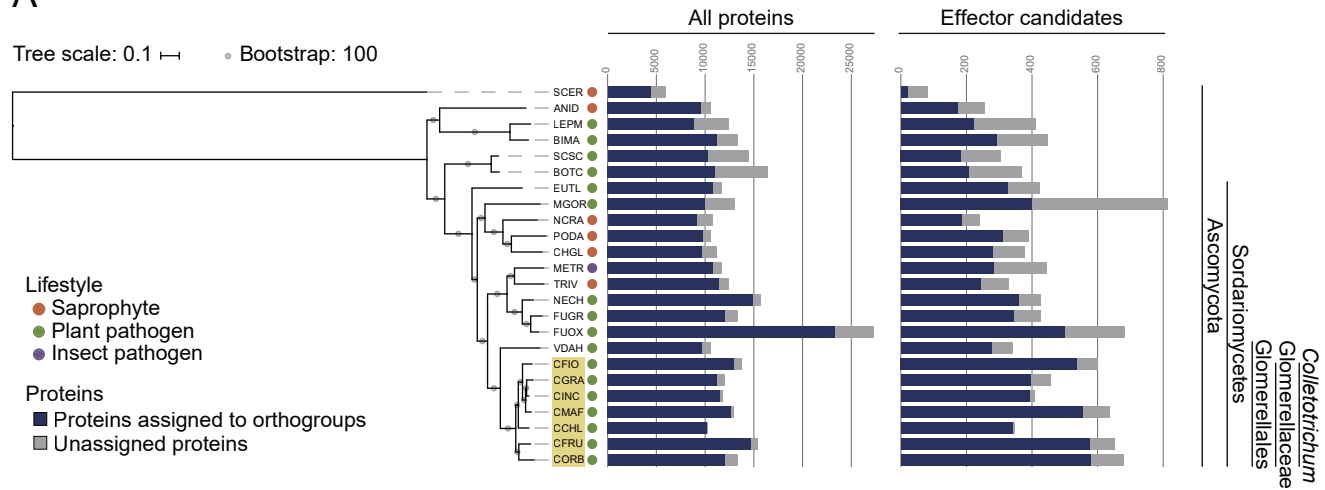

B

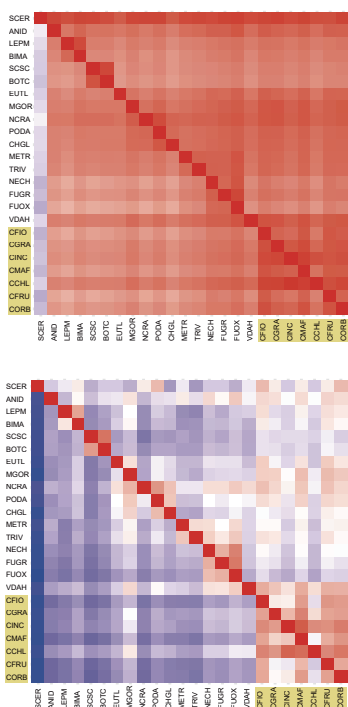

C

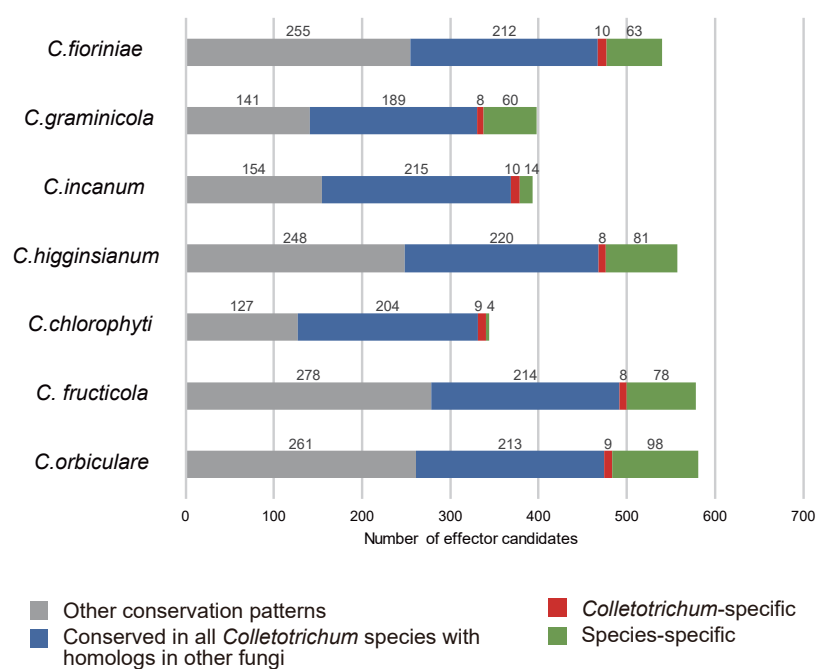

**FIGURE 1.** | Conservation patterns of proteomes from 24 ascomycete fungi. **(A)** Number of proteins assigned to orthogroups. A maximum-likelihood species phylogeny was drawn based on the alignment of single-copy orthologs obtained using OrthoFinder. Bootstrap values are based on 1,000 replicates. The yellow box indicates *Colletotrichum* species. SCER: *Saccharomyces cerevisiae*, ANID: *Aspergillus nidulans*, LEPM: *Leptosphaeria maculans*, BIMA: *Bipolaris maydis*, SCSC: *Sclerotinia sclerotiorum*, BOTC: *Botrytis cinerea*, EUTL: *Eutypa lata*, MGOR: *Magnaporthe oryzae*, NCRA: *Neurospora crassa*, PODA: *Podospora anserine*, CHGL: *Chaetomium globosum*, METR: *Metarhizium robertsii*, TRIV: *Trichoderma virens*, NECH: *Nectria haematococca*, FUGR: *Fusarium graminearum*, FUOX: *Fusarium oxysporum* f. sp. *lycopersici*, VDAH: *Verticillium dahliae*, CFIO: *C. fioriniae*, CGRA: *C. graminicola*, CINC: *C. incanum*, CMAF: *C. higginsianum*, CCHL: *C. chlorophyti*, CFRU: *C. fructicola*, CORB: *C. orbiculare*. **(B)** Heatmap showing the conservation of orthogroups of all proteins (upper) and effector candidates (lower) between each species. *Colletotrichum* species are highlighted with yellow boxes. **(C)** Conservation patterns of effector candidates from *Colletotrichum* species. The bar chart indicates the number of effector candidates in orthogroups by conservation pattern.

A

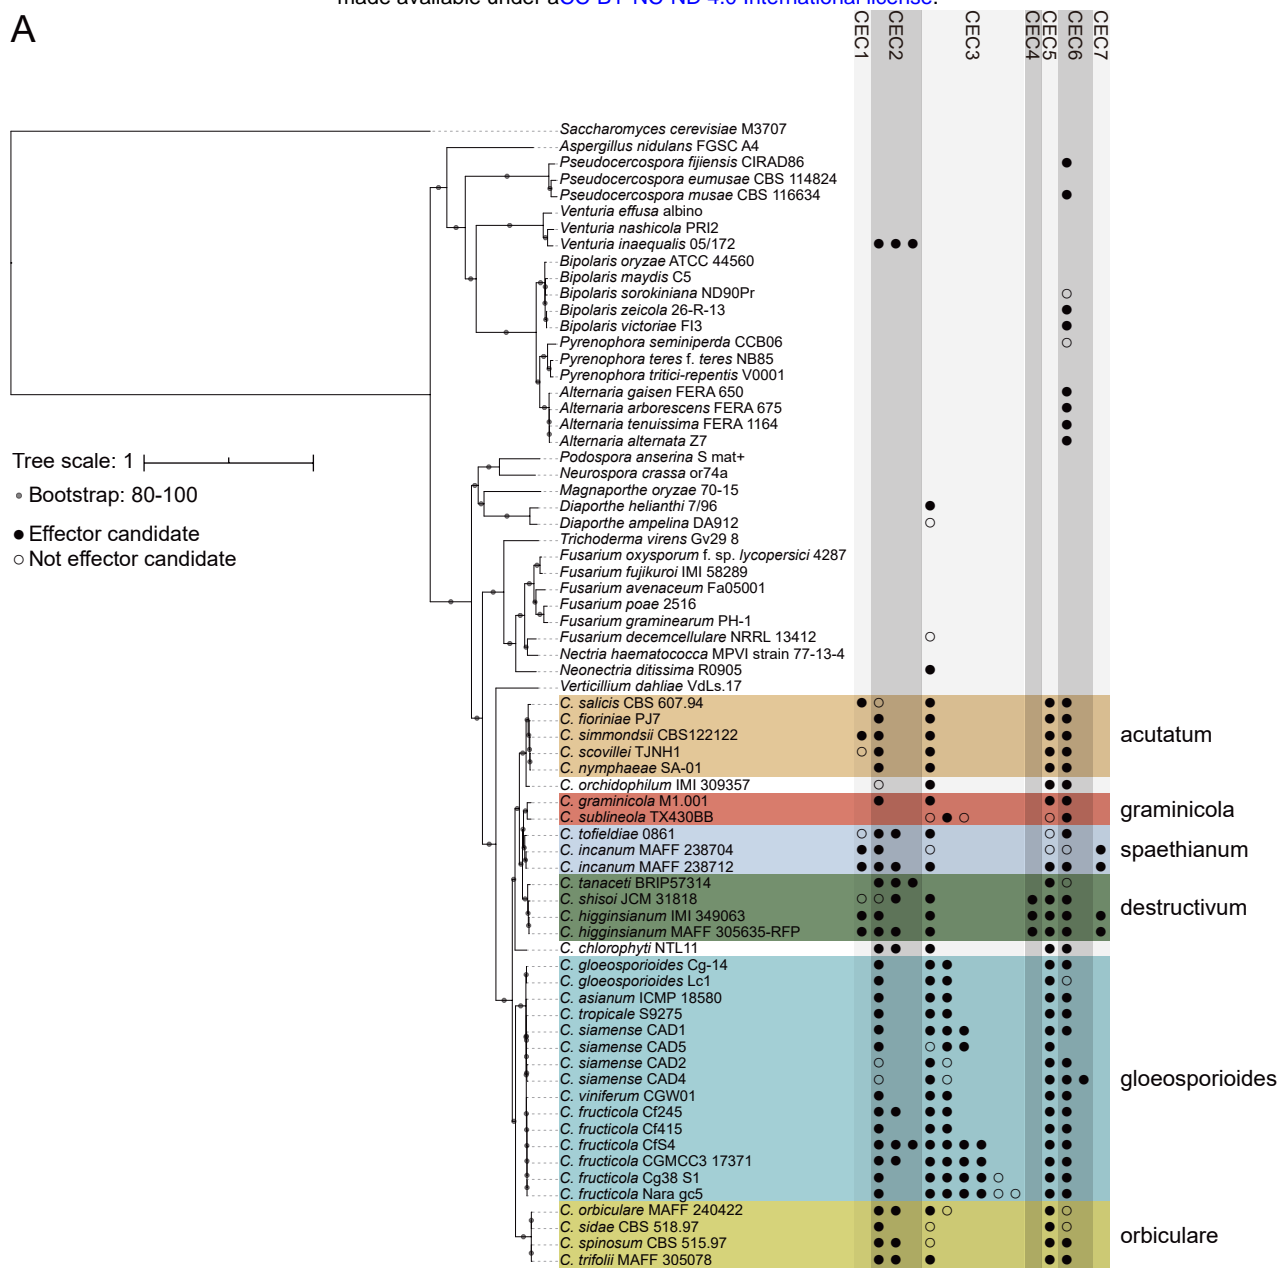

B

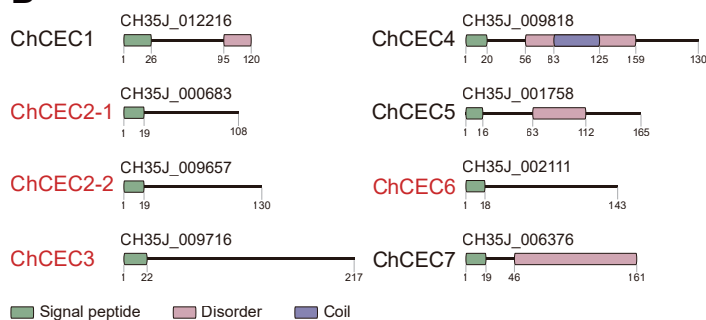

C

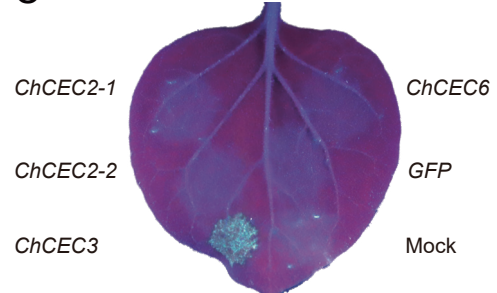

**FIGURE 2.** | (A) Conservation patterns of *CEC* genes examined using BLASTP. The maximum-likelihood species phylogeny was drawn based on the alignment patterns of single-copy orthologs obtained using OrthoFinder. Bootstrap values are based on 1,000 replicates. Colored boxes represent species complexes within the *Colletotrichum* genus. (B) Predicted functional domains of CEC proteins found in *C. higginsianum* MAFF 305635-RFP. Red letters indicate effector candidates that are up-regulated during infection as reported previously (O'Connell et al., 2012). (C) Representative cell death assay result using *A. tumefaciens* harboring pSfinx vectors. The image was taken six days after infiltration under UV illumination. No GFP fluorescence was visible, as it was weaker than fluorescence from dead leaf tissue.

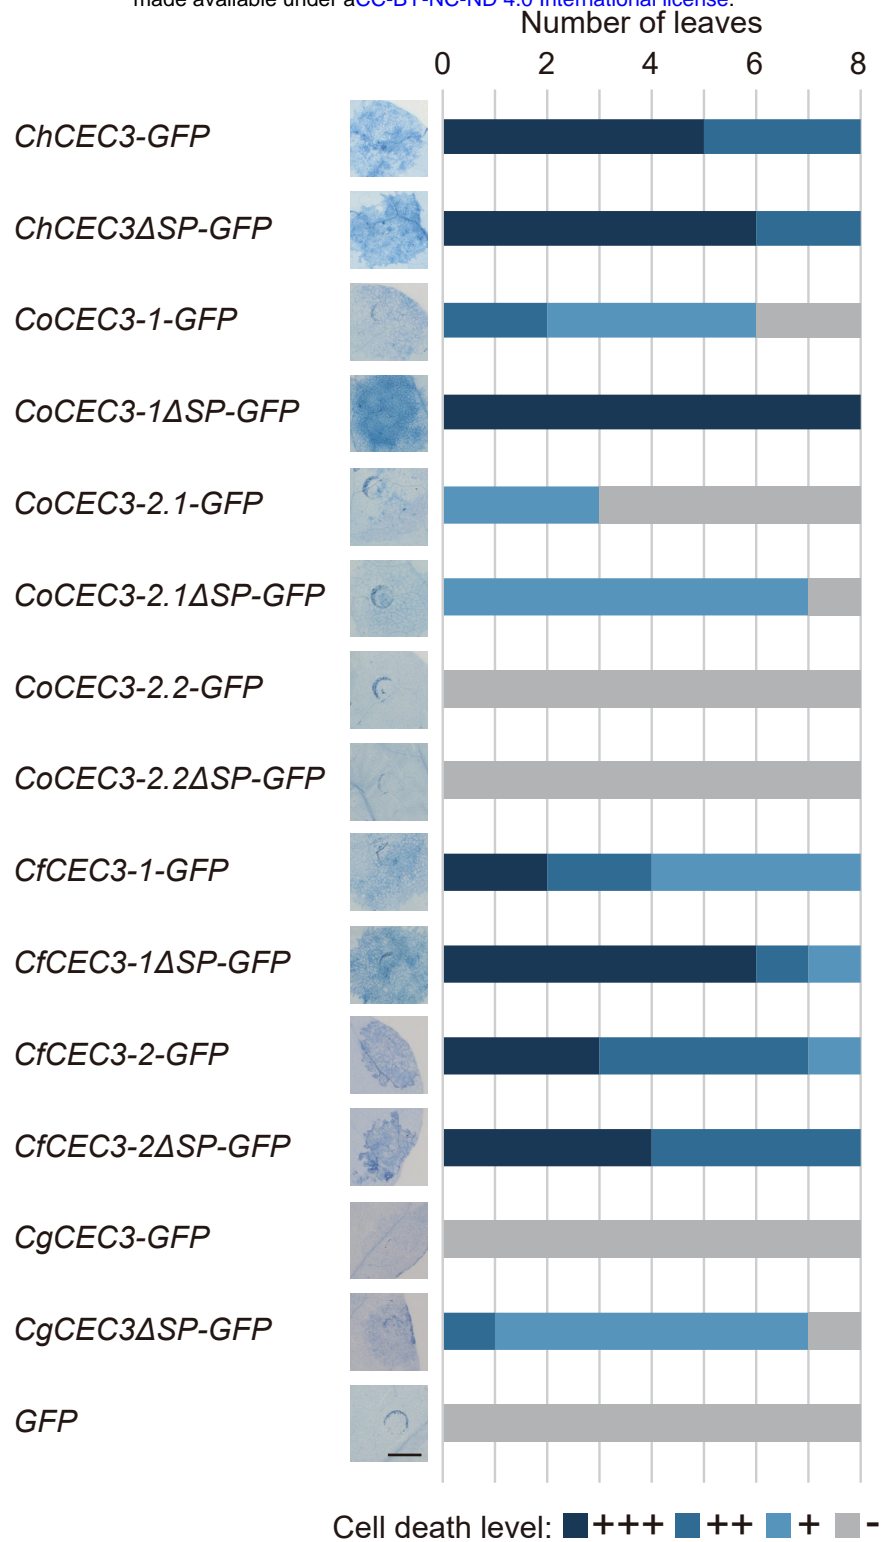

**FIGURE 3.** | Transient expression of *GFP*-tagged *CEC3* gene-induced cell death in *N. benthamiana*. *N. benthamiana* leaves were detached five days after infiltration with *A. tumefaciens* strains carrying *GFP*-tagged *CEC3* genes in binary vectors, and stained with trypan blue to visualize cell death. Stacked bars are color-coded to show the number of each cell death level (+++, ++, +, -). Cell death induction levels were determined from observation of eight different stained leaves. Representative stained leaf images are shown on the left of the stacked bars. Bar = 5 mm.

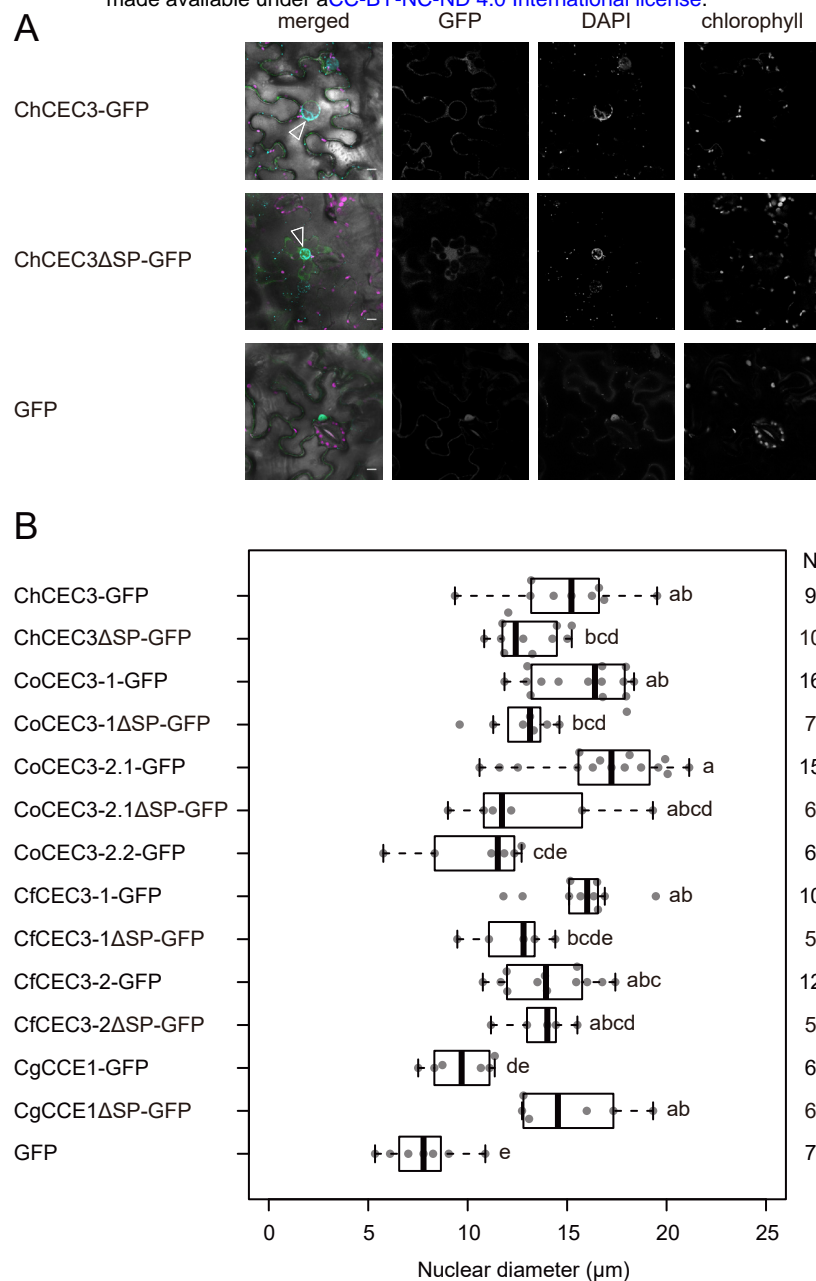

**FIGURE 4.** | (A) Transient expression of GFP-tagged ChCEC3 protein-induced nuclear expansion in *N. benthamiana* leaf cells. In merged images, green represents GFP signals, cyan represents DAPI signals, and magenta represents chlorophyll autofluorescence. Open arrowheads indicate expanded nuclei. Images were taken 24 hours after infiltration. Bars = 10  $\mu\text{m}$ . (B) Boxplots of nuclear diameters resulting from transient expression of GFP-tagged CEC3 proteins. Data represent the medians of biological replicates. N represents the number of nuclei examined. CoCEC3-2.2ΔSP-GFP is not included because no GFP signal was detected. Analysis of variance with Tukey post-hoc honestly significant difference test ( $P < 0.05$ ) was performed.



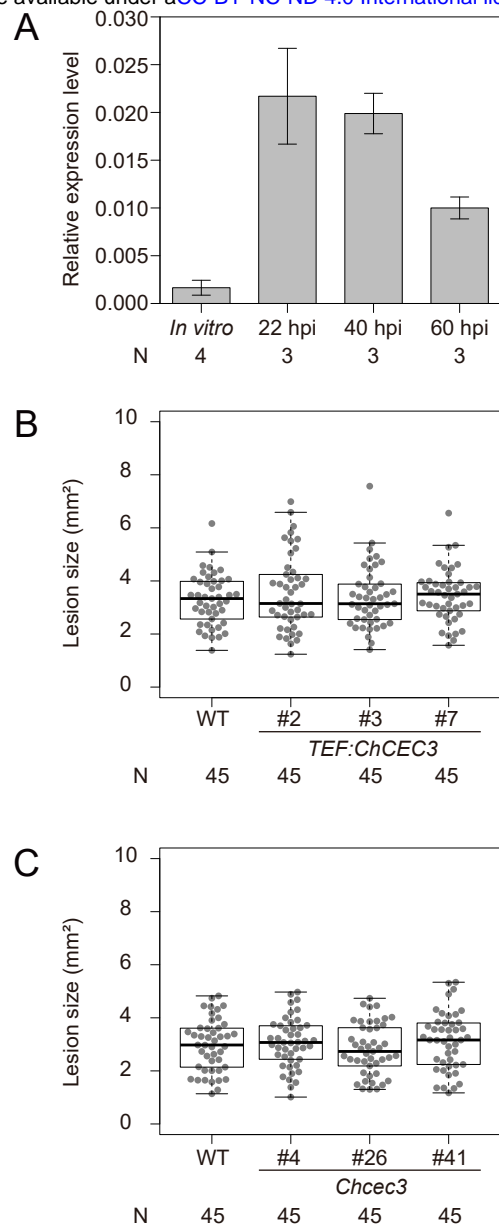

**FIGURE 5.** | (A) RT-qPCR analysis of *ChCEC3* transcript levels in hyphae *in vitro* versus *in planta* infection time course. *ChCEC3* transcript levels were normalized against *ChTubulin*. Data represent the means of biological replicates. Error bars indicate standard error of the mean. N represents the number of biological replicates. (B and C) Boxplots of lesion area assays using *ChCEC3* overexpressors and knock-out mutants. For lesion area assays, *A. thaliana* ecotype Col-0 was inoculated with *C. higginsianum* strains. Symptoms were observed six days after inoculation. Data represent the medians of biological replicates. N represents the number of biological replicates. Analysis of variance with Tukey post-hoc honestly significant difference test ( $P < 0.05$ ) was performed. The experiments were repeated three times with similar results.
